# Supplementary material for: Marine reserve benefits and recreational fishing yields: The winners and the losers
Source: PLOS journal article supplement (doi:10.1371/journal.pone.0237685), 2020-12-10
Supplement: S2 (10.1371/journal.pone.0237685.s002) [file journal.pone.0237685.s002]

**S2 Table** Deviance table of generalized linear models characterizing changes in catch per unit effort (CPUE) and weight per unit effort (WPUE) of recreational fishermen fishing on-shore from the coastline versus off-shore from boats, and inside versus outside the Cerbère-Banyuls marine reserve. Separate two-factor models (referred to as model sets) characterized CPUE and WPUE trajectories as a function of *Time*, *Reserve*, and their interaction (*Time* × *Reserve*). Changes in fishing yields are characterized for all species combined (model sets 1-3) as well as separately for each of the three major fish families captured by recreational fishermen: Sparidae, Serranidae, and Labridae (model sets 4-9). For Sparidae, for which yields were increasing, an additional model was used to compare WPUE trajectories between on- versus off-shore, indistinctly from fishermen location inside or outside of the reserve (model 10). The corresponding trajectories are illustrated in Figs. 2 (model set 1), 3 (model sets 2 and 3), and 4 (model sets 4-9).

| Species    | Shore     | Reserve   | Factor                         | CPUE     |         | WPUE     |         | Model set |
|------------|-----------|-----------|--------------------------------|----------|---------|----------|---------|-----------|
|            |           |           |                                | deviance | p-value | deviance | p-value |           |
| all        | both      | in vs out | <i>Time</i>                    | 50.26    | 0.0000  | 1.89     | 0.1687  | 1         |
|            |           |           | <i>Reserve</i>                 | 3.84     | 0.0499  | 6.02     | 0.0141  |           |
|            |           |           | <i>Time</i> × <i>Reserve</i>   | 0.41     | 0.5244  | 10.81    | 0.0010  |           |
|            | on        | in vs out | <i>Time</i>                    | 2.84     | 0.0919  | 5.32     | 0.0210  | 2         |
|            |           |           | <i>Reserve</i>                 | 3.35     | 0.0670  | 1.82     | 0.1772  |           |
|            |           |           | <i>Time</i> × <i>Reserve</i>   | 0.12     | 0.7319  | 1.32     | 0.2509  |           |
|            | off       | in vs out | <i>Time</i>                    | 38.42    | 0.0000  | 0.17     | 0.6799  | 3         |
|            |           |           | <i>Reserve</i>                 | 2.21     | 0.1372  | 3.19     | 0.0741  |           |
|            |           |           | <i>Time</i> × <i>Reserve</i>   | 2.64     | 0.1042  | 1.74     | 0.1868  |           |
| Sparidae   | on        | in vs out | <i>Time</i>                    | 0.9080   | 0.3407  | 4.9491   | 0.0261  | 4         |
|            |           |           | <i>Reserve</i>                 | 1.4254   | 0.2325  | 1.1525   | 0.2830  |           |
|            |           |           | <i>Time</i> × <i>Reserve</i>   | 0.5519   | 0.4575  | 3.2102   | 0.0732  |           |
|            | off       | in vs out | <i>Time</i>                    | 0.4075   | 0.5232  | 3.82     | 0.0505  | 5         |
|            |           |           | <i>Reserve</i>                 | 1.6883   | 0.1938  | 0.6265   | 0.4287  |           |
|            |           |           | <i>Time</i> × <i>Reserve</i>   | 0.7246   | 0.3946  | 0.37     | 0.5424  |           |
|            | on vs off | both      | <i>Time</i>                    |          |         | 0.07     | 0.7983  | 10        |
|            |           |           | <i>Fishermen</i>               |          |         | 7.64     | 0.0057  |           |
|            |           |           | <i>Time</i> × <i>Fishermen</i> |          |         | 10.32    | 0.0013  |           |
| Serranidae | on        | in vs out | <i>Time</i>                    | 1.87     | 0.1720  | 0.07     | 0.7891  | 6         |
|            |           |           | <i>Reserve</i>                 | 3.61     | 0.0576  | 0.9762   | 0.3231  |           |
|            |           |           | <i>Time</i> × <i>Reserve</i>   | 4.07     | 0.0436  | 0.1281   | 0.7204  |           |
|            | off       | in vs out | <i>Time</i>                    | 36.75    | 0.0000  | 10.33    | 0.0013  | 7         |
|            |           |           | <i>Reserve</i>                 | 12.96    | 0.0003  | 11.16    | 0.0008  |           |
|            |           |           | <i>Time</i> × <i>Reserve</i>   | 0.17     | 0.6765  | 0.01     | 0.9076  |           |
| Labridae   | on        | in vs out | <i>Time</i>                    | 3.81     | 0.0510  | 7.40     | 0.0065  | 8         |
|            |           |           | <i>Reserve</i>                 | 0.54     | 0.4613  | 0.23     | 0.6316  |           |
|            |           |           | <i>Time</i> × <i>Reserve</i>   | 0.01     | 0.9134  | 0.31     | 0.5791  |           |
|            | off       | in vs out | <i>Time</i>                    | 4.19     | 0.0407  | 2.07     | 0.1506  | 9         |
|            |           |           | <i>Reserve</i>                 | 7.81     | 0.0052  | 0.40     | 0.5261  |           |
|            |           |           | <i>Time</i> × <i>Reserve</i>   | 3.45     | 0.0632  | 0.00     | 0.9596  |           |
